# Supplementary material for: Three-dimensionally ordered mesoporous Pd networks templated by a silica super crystal and their application in formic acid electrooxidation
Source: Royal Society of Chemistry journal article supplement (doi:10.1039/c1cc11652e), 2011-01-01
Supplement: c1cc11652e.pdf [file c1cc11652e.pdf]

## Supporting Information

### 1. Typical procedure for the preparation of silica nanoparticles

1 mmol Igepal CO-520 was dispersed in 10 ml of cyclohexane by sonication for 40 min. Then 80  $\mu\text{l}$  of ammonia solution was added into the prepared solution. Finally, 60  $\mu\text{l}$  of tetraethyl orthosilicate was added and the mixture was stirring for 48 h in order to complete the hydrolysis and condensation reactions of the precursors to silica.

### 2. Pd electrode preparation and electrochemical measurements

A polished glass-carbon disk electrode was used as the substrate ( $d = 5 \text{ mm}$ ). 10  $\mu\text{l}$  of suspension containing 3DOM Pd networks or ultrafine Pd black (0.5 mg/ml) after ultrasonication was pipetted onto the electrode and dried in air at room temperature. Then, 2  $\mu\text{l}$  of Nafion solution (5 wt.%) was pipetted on it and the Pd working electrode was obtained. A conventional three-electrode cell was used, including a saturated calomel electrode (SCE) as the reference electrode, a platinum wire as the counter electrode and the as-prepared Pd electrodes as the working electrode. The Pd loading was  $25 \mu\text{g cm}^{-2}$ . Cyclic voltammeter (CV) with a scanning rate of  $50 \text{ mV S}^{-1}$  and chronoamperometry (CA) experiments at 0.23 V were performed in a 0.5 M  $\text{H}_2\text{SO}_4$  + 0.5 M  $\text{HCOOH}$  solution at room temperature.

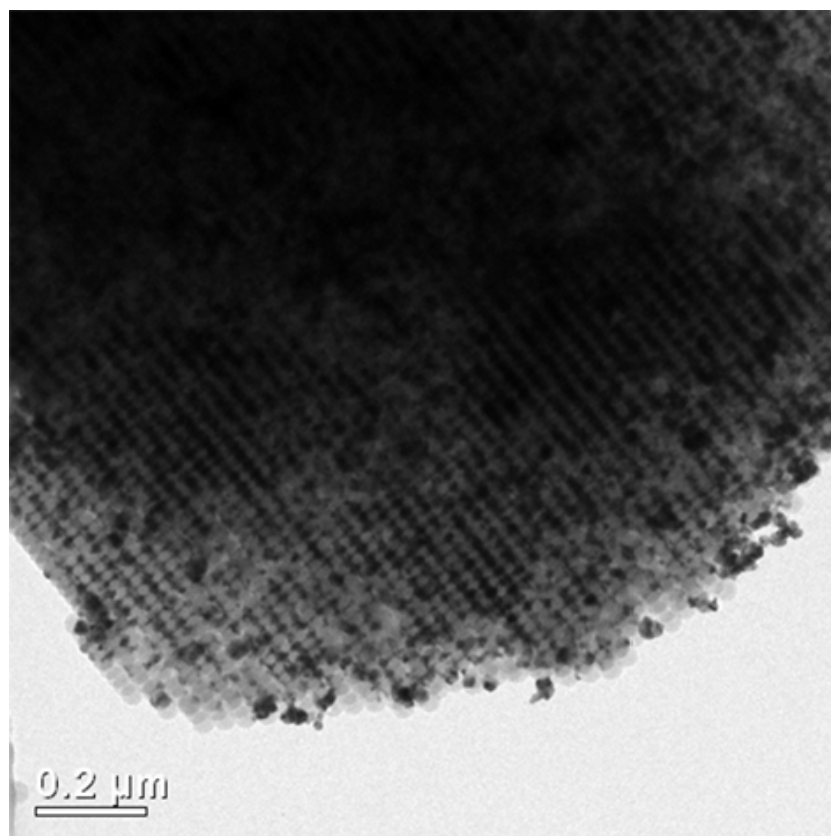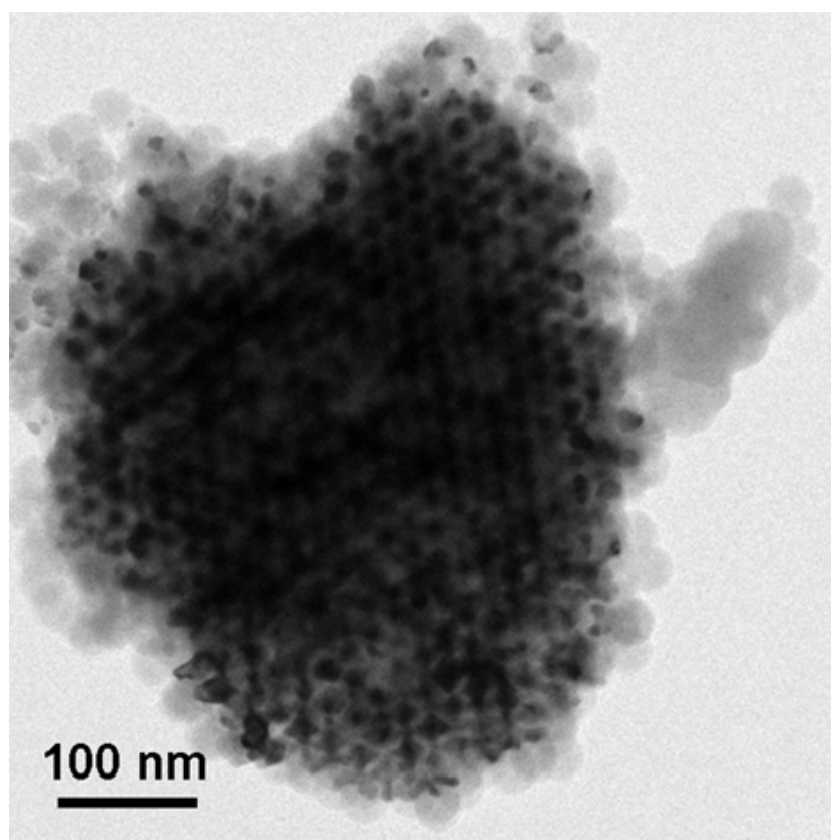

Fig. S1 TEM images of Pd-infiltrated silica super crystal

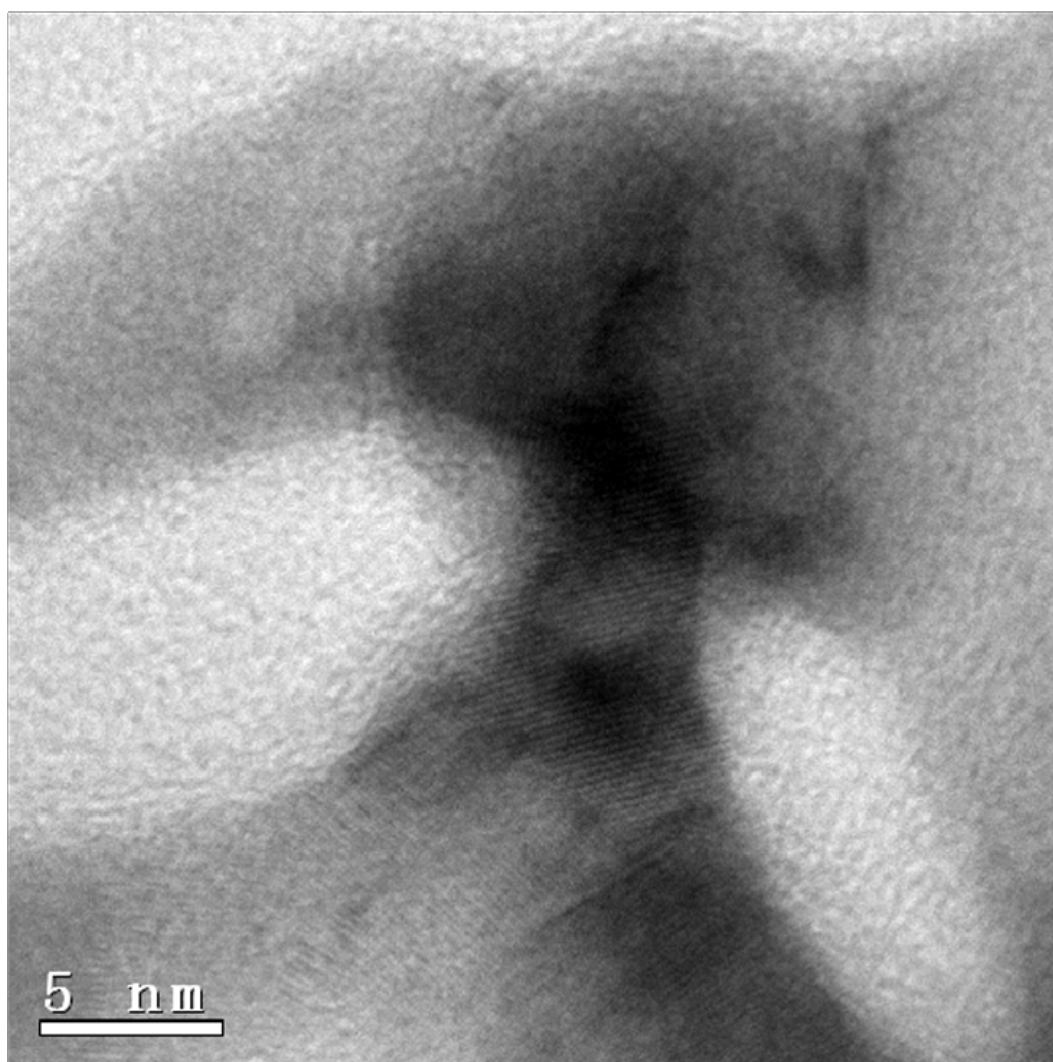

Fig. S2 HRTEM image of silica-free 3DOM Pd networks

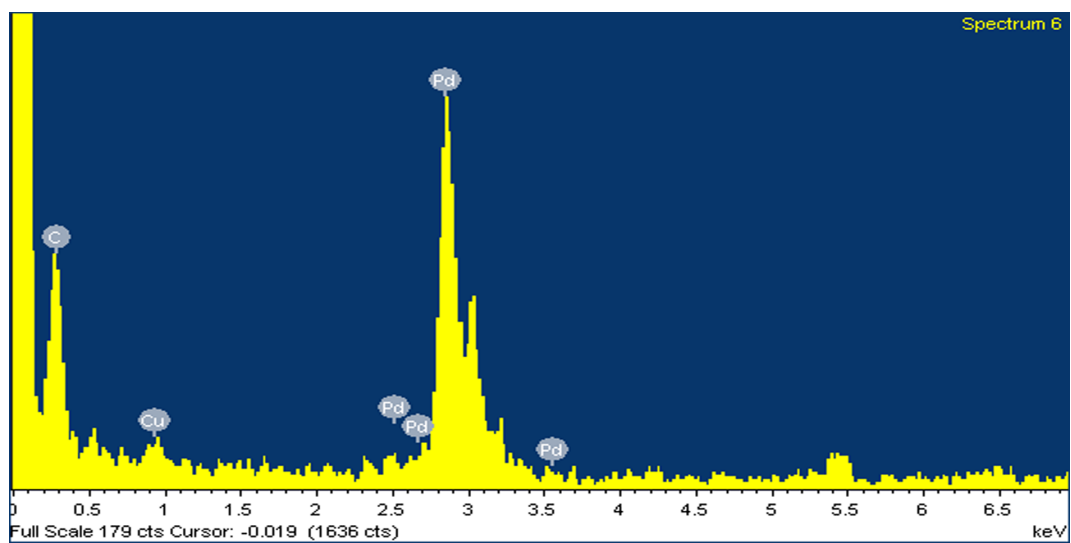

Fig. S3 EDX of silica-free 3DOM Pd networks

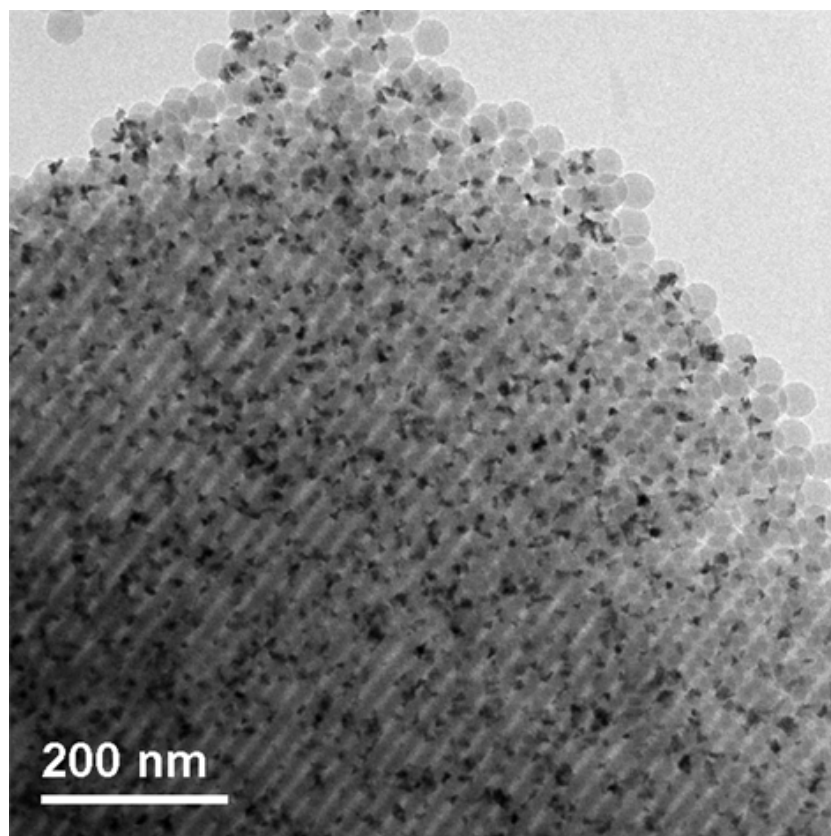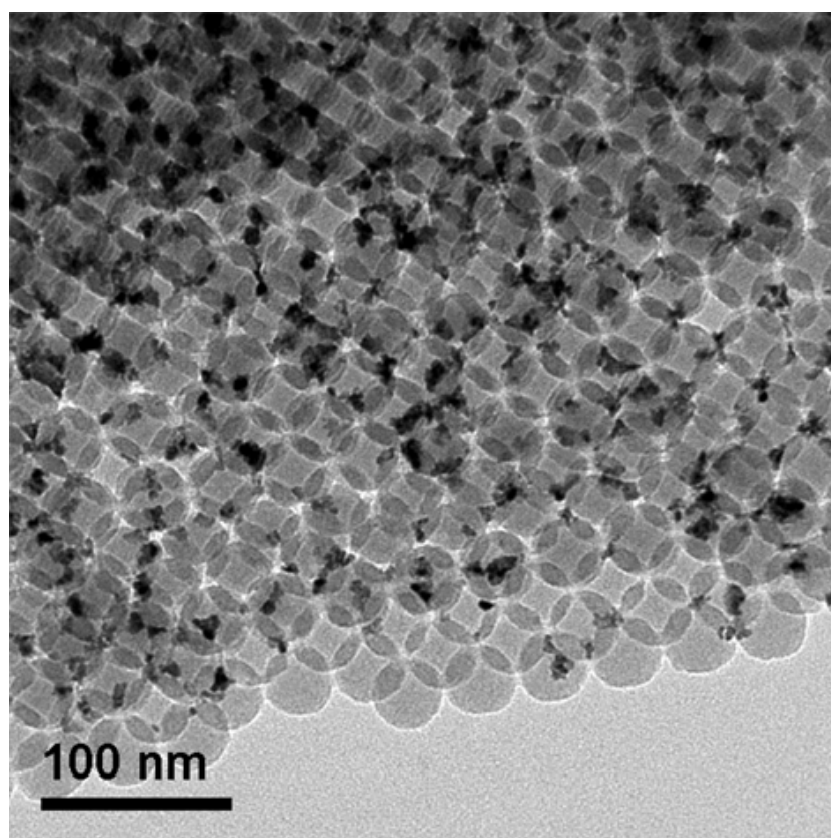

Fig. S4 TEM images of Pt infiltrated silica super crystal
